# Supplementary material for: On the understanding of bio-oil formation from the hydrothermal liquefaction of organosolv lignin isolated from softwood and hardwood sawdust
Source: Royal Society of Chemistry journal article supplement (doi:10.1039/d3se00976a), 2023-01-01
Supplement: d3se00976a1.pdf [file d3se00976a1.pdf]

**On the understanding of bio-oil formation from the hydrothermal liquefaction of organosolv lignin isolated from softwood and hardwood sawdust**

Petter Paulsen Thoresen<sup>1</sup>, Jonas Fahrni<sup>2</sup>, Heiko Lange<sup>1,3,4</sup>, Jasmine Hertzog<sup>5</sup>, Vincent Carré<sup>5</sup>, Ming Zhou<sup>6</sup>, Anna Trubetskaya<sup>7</sup>, Frédéric Aubriet<sup>5</sup>, Jonas Hedlund<sup>6</sup>, Tomas Gustafsson<sup>2</sup>, Ulrika Rova<sup>1</sup>, Paul Christakopoulos<sup>1</sup>, Leonidas Matsakas<sup>1,\*</sup>

<sup>1</sup> *Biochemical Process Engineering; Division of Chemical Engineering; Department of Civil, Environmental and Natural Resources Engineering; Luleå University of Technology, 971-87, Sweden*

<sup>2</sup> *RISE Processum AB; Department Biorefinery and Energy, Division of Bioeconomy and Health, Research Institute of Sweden, 981 22 Örnsköldsvik, Sweden*

<sup>3</sup> *Department of Earth and Environmental Sciences, University of Milano-Bicocca, Piazza della Scienza 1, 20126 Milan, Italy*

<sup>4</sup> *NBFC – National Biodiversity Future Center, 90133 Palermo, Italy*

<sup>5</sup> *Université de Lorraine, LCP-A2MC, 57000 Metz, France*

<sup>6</sup> *Chemical Technology, Luleå University of Technology, 971 87 Luleå, Sweden*

<sup>7</sup> *Department of Biosciences, Nord University, 7713 Steinkjer, Norway*

**\*Author for correspondence:** Leonidas Matsakas, Department of Civil, Environmental and Natural Resources Engineering, SE-971 87 Luleå Sweden, [leonidas.matsakas@ltu.se](mailto:leonidas.matsakas@ltu.se), tel.: +46 (0) 920 493043.

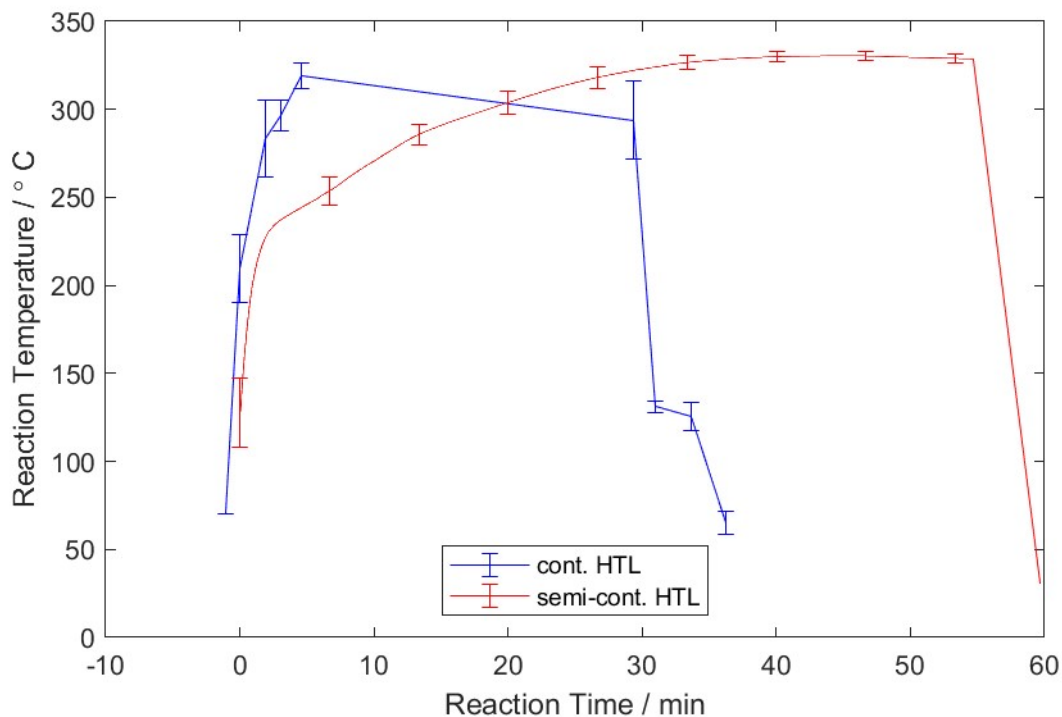

Figure S1: Example of heat profile in the semi-continuous mode (semi-cont. HTL; SU-BA) and continuous system (cont. HTL).

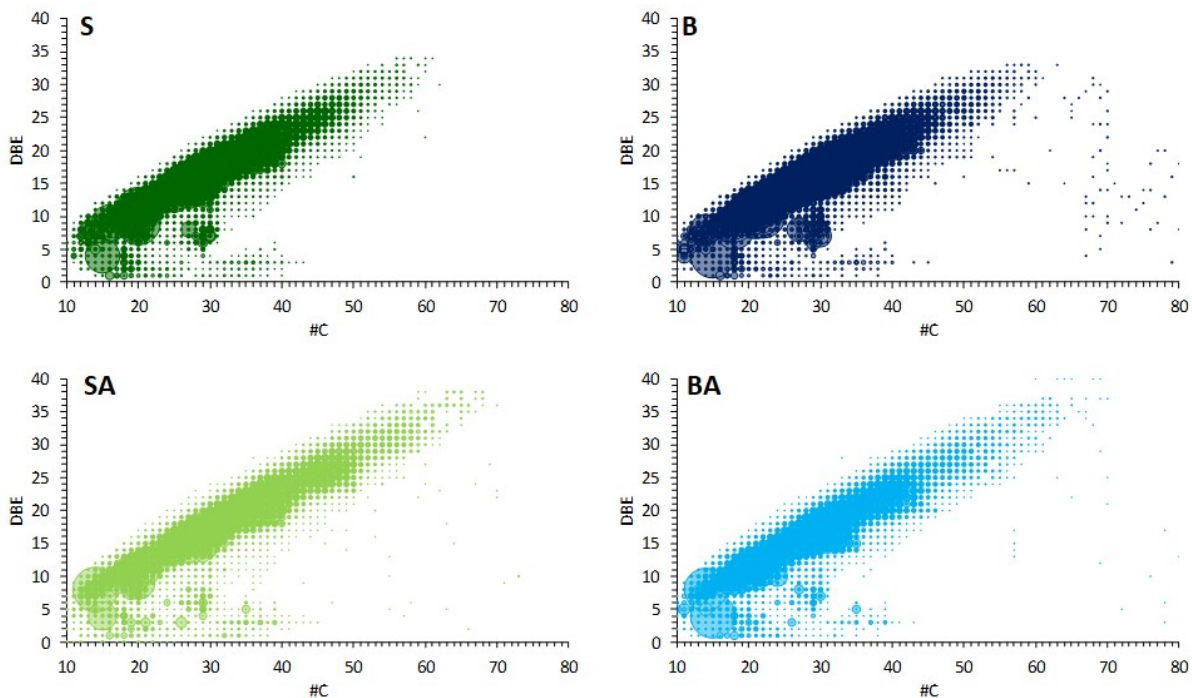

Figure S2: DBE vs. carbon number graph of CHO compounds detected by APPI FT-ICR MS of the four different HO obtained from spruce and birch lignins isolated in the absence (S, B) and presence (SA, BA) of acid-catalyst.
